# Supplementary material
Source: publisher figshare collection journal article supplement (https://scielo.figshare.com/articles/dataset/_/5792163)
Supplement: Supplementary file 1 [file Table_1.xls]

## Sheet: Table_1
<b></b>	<b>CST-IT group N = 21 (15 females)</b>		<b></b>	<b>Active control group N = 14 (13 females)</b>		<b>Between-group comparisons</b>
	M	SD		M	SD
Age	83.81	10.93		85.43	5.18	t = –0.51	p = 0.61
Education (years)	5.90	3.22		4.64	1.69	t = 1.34	p = 0.18
