# Supplementary material
Source: publisher figshare collection journal article supplement (https://scielo.figshare.com/articles/dataset/_/5792163)
Supplement: Supplementary file 2 [file Table_2.xls]

## Sheet: Table_2
<b>• Pre-test session 1: Mini-Mental State Examination, Alzheimer's Disease Assessment Scale - Cognitive subscale, Cornell scale, Disability Assessment for Dementia, Backward digit span task.<br> &#8226; Pre-test session 2: Neuropsychiatric Inventory, Narrative language test, Quality of Life - Alzheimer's Disease scale</b>
<strong>CST-IT group Main themes/activities</strong>		<strong>Active control group Main themes/activities</strong>
1	Physical games	Reading stories/newspapers, discussion
2	Sounds	Creative activities: painting, coloring, decorating, cooking.
3	My life	Reading stories/newspapers, discussion
4	Food	Creative activities: painting, coloring, decorating, cooking.
5	Current affairs	Reading stories/newspapers, discussion
6	Faces and places	Creative activities: painting, coloring, decorating, cooking.
7	Word associations	Reading stories/newspapers, discussion
8	Being creative	Creative activities: painting, coloring, decorating, cooking.
9	Categorizing objects	Reading stories/newspapers, discussion
10	Orientation	Creative activities: painting, coloring, decorating, cooking.
11	Using money	Reading stories/newspapers, discussion
12	Number games	Creative activities: painting, coloring, decorating, cooking.
13	Word games	Reading stories/newspapers, discussion
14	Team games	Creative activities: painting, coloring, decorating, cooking.
• Post-test session 1: Mini-Mental State Examination, Alzheimer's Disease Assessment Scale - Cognitive subscale, Cornell scale, Disability Assessment for Dementia, Backward digit span task.<br> &#8226; Post-test session 2: Neuropsychiatric Inventory, Narrative language test, Quality of Life - Alzheimer's Disease scale.
