# Supplementary material
Source: publisher figshare collection journal article supplement (https://scielo.figshare.com/articles/dataset/_/5792163)
Supplement: Supplementary file 3 [file Table_3.xls]

## Sheet: Table_3
<b></b>	<b>CST-IT group Pre-test</b>		<b>Active controls Pre-test</b>		<b>CST-IT group vs Active controls</b>		<b>CST-IT group Post-test</b>		<b>Active controls Post-test</b>
	M	SD	M	SD	t (33)	<em>p</em>	M	SD	M	SD
MMSE	20.29	3.42	19.03	4.65	0.92	0.36	21.72	4.45	17.79	3.47
ADAS-Cog	31.85	10.25	31.22	12.14	0.16	0.86	28.99	9.36	32.29	9.75
Backward digit span task	2.88	0.62	2.25	0.97	1.97	0.08	3.19	1.33	2.17	0.39
Narrative language test	9.90	4.56	13.69	7.19	–1.86	0.10	12.35	5.28	12.77	6.34
Quality of life – Alzheimer's Disease Scale, people with dementia	25.05	9.78	28.43	7.82	–1.08	0.27	27.35	9.41	28.00	6.87
Quality of life – Alzheimer's Disease Scale, caregivers	28.94	7.42	26.92	6.01	0.79	0.44	29.89	7.01	27.75	6.20
Social and emotional loneliness scale Total score	16.71	3.84	16.93	5.08	–0.14	0.88	18.33	5.09	18.64	4.89
Social and emotional loneliness scale: Social loneliness	8.52	2.58	8.21	3.02	0.32	0.74	8.90	3.21	8.14	3.23
Social and emotional loneliness scale: Emotional loneliness	8.19	2.18	8.71	2.84	–0.62	0.54	9.43	2.54	10.50	1.95
Cornell scale	5.90	5.45	4.14	2.54	1.13	0.27	4.19	4.33	3.50	4.01
NPI – total score	9.71	12.81	4.43	4.64	1.47	0.15	7.86	9.24	4.00	3.92
NPI – distress score	4.50	4.89	1.92	2.72	1.72	0.09	3.85	4.68	2.08	2.57
Disability Assessment for Dementia	42.33	26.45	38.44	21.61	0.36	0.72	43.10	22.63	41.92	18.98
