# Supplementary material
Source: publisher figshare collection journal article supplement (https://scielo.figshare.com/articles/dataset/_/5792163)
Supplement: Supplementary file 4 [file Table_4.xls]

## Sheet: Table_4
<b></b>	<b>Main effects</b>	<b>F (1,35)</b>	<b>η<sup>2</sup><sub>p</sub></b>	<b></b>
MMSE	covariate	40.59	0.56<a href="#TFN6">***</a>
	group	9.39	0.23<a href="#TFN5">**</a>	CST-IT group > Active controls
ADAS-Cog	covariate	98.33	0.75<a href="#TFN6">***</a>
	group	5.20	0.14<a href="#TFN4">*</a>	CST-IT group < Active controls
Backward digit span task	covariate	2.07	0.08
	group	3.54	0.12<a href="#TFN7">^</a>	CST group > Active controls
Narrative language test	covariate	27.05	0.47<a href="#TFN6">***</a>
	group	1.91	0.06
Quality of life - Alzheimer's Disease Scale, people with dementia	covariate	107.01	0.77<a href="#TFN6">***</a>
	group	3.22	0.09<a href="#TFN8">^^</a>	CST group > Active controls
Quality of life - Alzheimer's Disease Scale, caregivers	covariate	122.55	0.82<a href="#TFN6">***</a>
	group	<1
Social and emotional loneliness scale: total score	covariate	68.54	0.68<a href="#TFN6">***</a>
	group	<1
Social and emotional loneliness scale: social loneliness	covariate	48.59	0.60<a href="#TFN6">***</a>
	group	<1
Social and emotional loneliness scale: emotional loneliness	covariate	37.98	0.54<a href="#TFN6">***</a>
	group	1.62	0.04
Cornell scale	covariate	32.97	0.51<a href="#TFN6">***</a>
	group	<1
NPI – total score	covariate	53.54	0.62<a href="#TFN6">***</a>
	group	4.98	0.63
NPI – distress score	covariate	118.09	0.80<a href="#TFN6">***</a>
	group	<1
Disability Assessment for Dementia	covariate	78.82	0.81<a href="#TFN6">***</a>
	group	<1
